# Supplementary material
Source: PubMed Central journal article supplement (PMC4557884)

# ESM Fig. 1

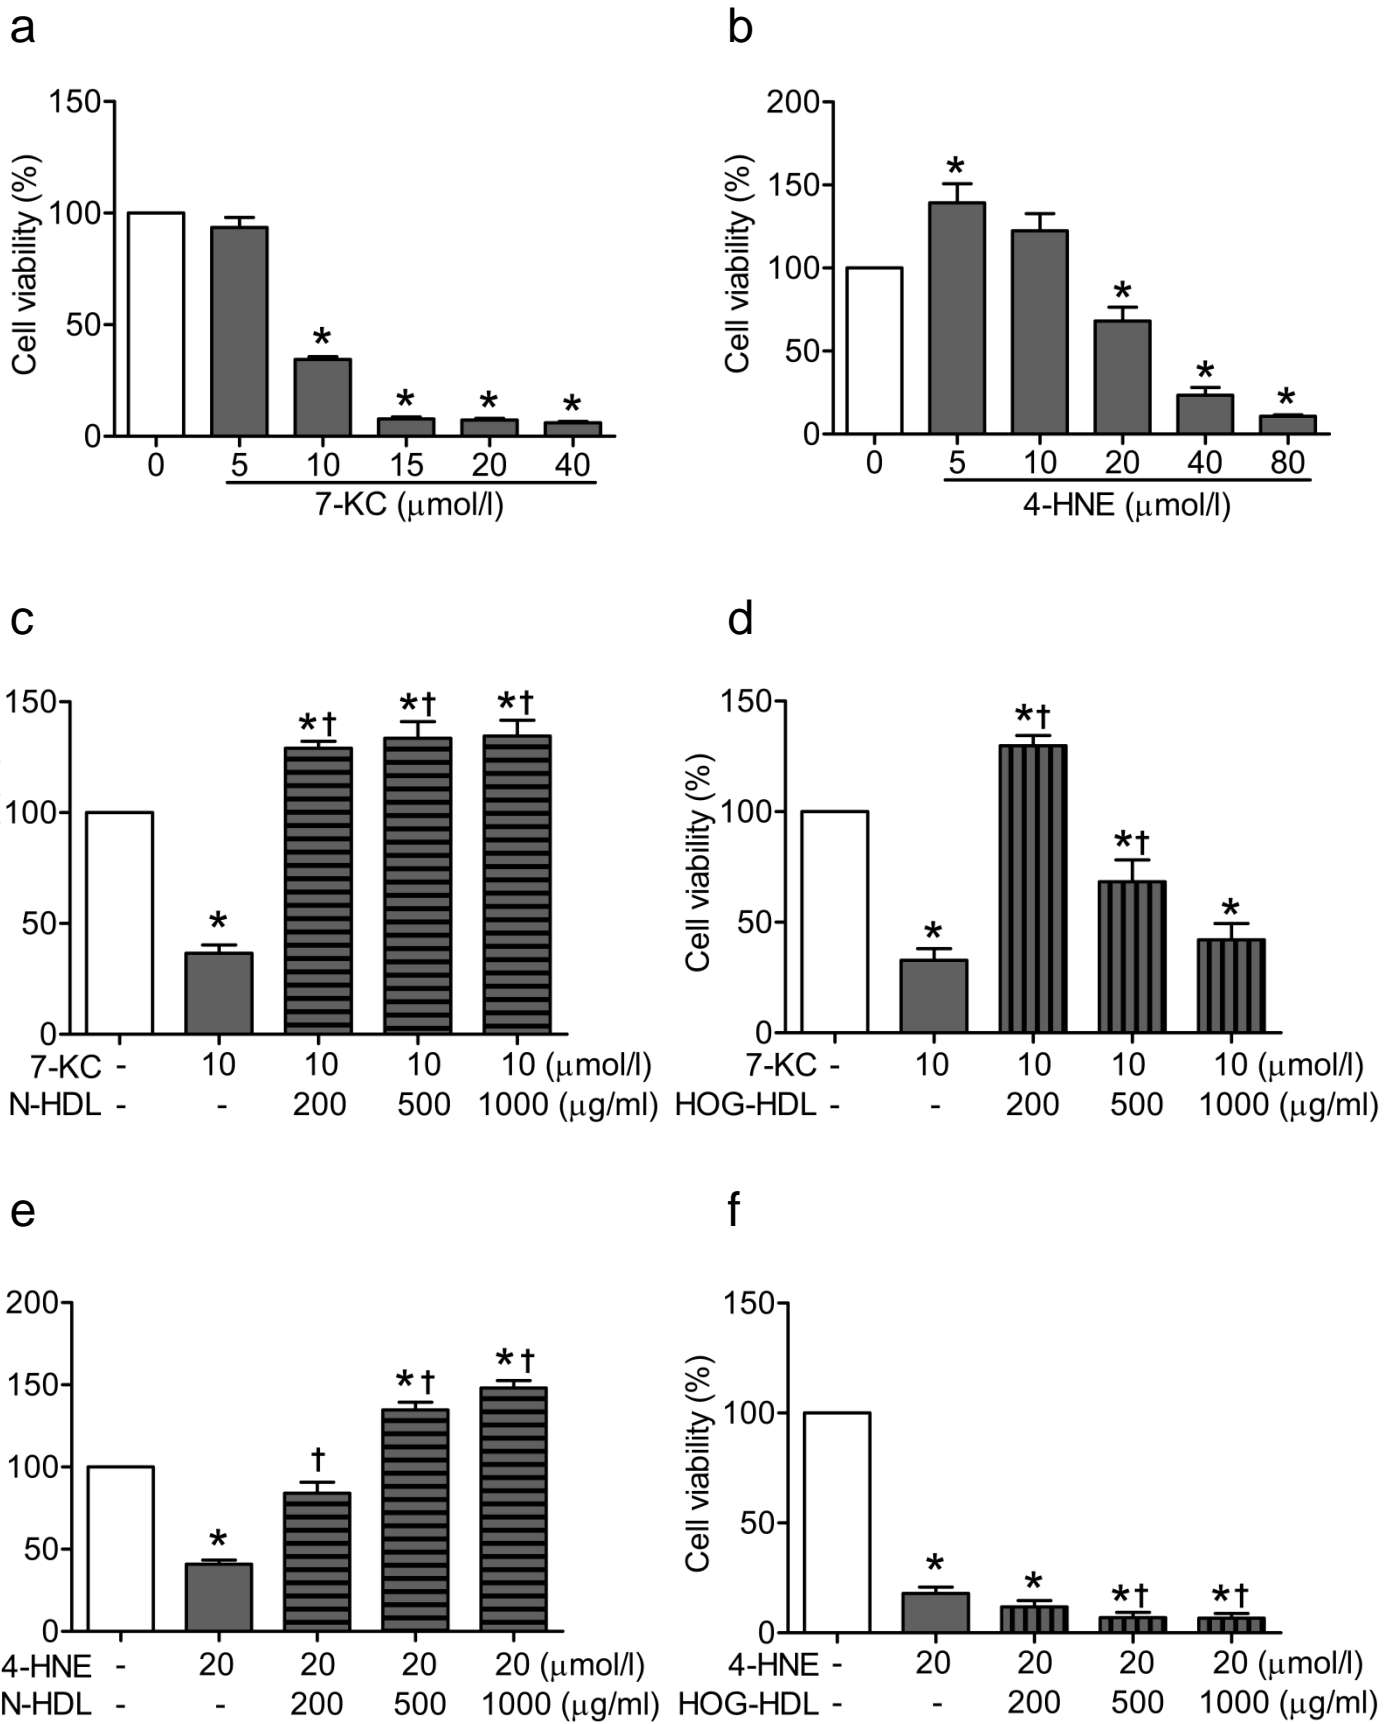

Supplement: NIHMS504720-supplement-125_2013_2986_MOESM1_ESM.pdf [file NIHMS504720-supplement-125_2013_2986_MOESM1_ESM.pdf]

# ESM Fig. 2

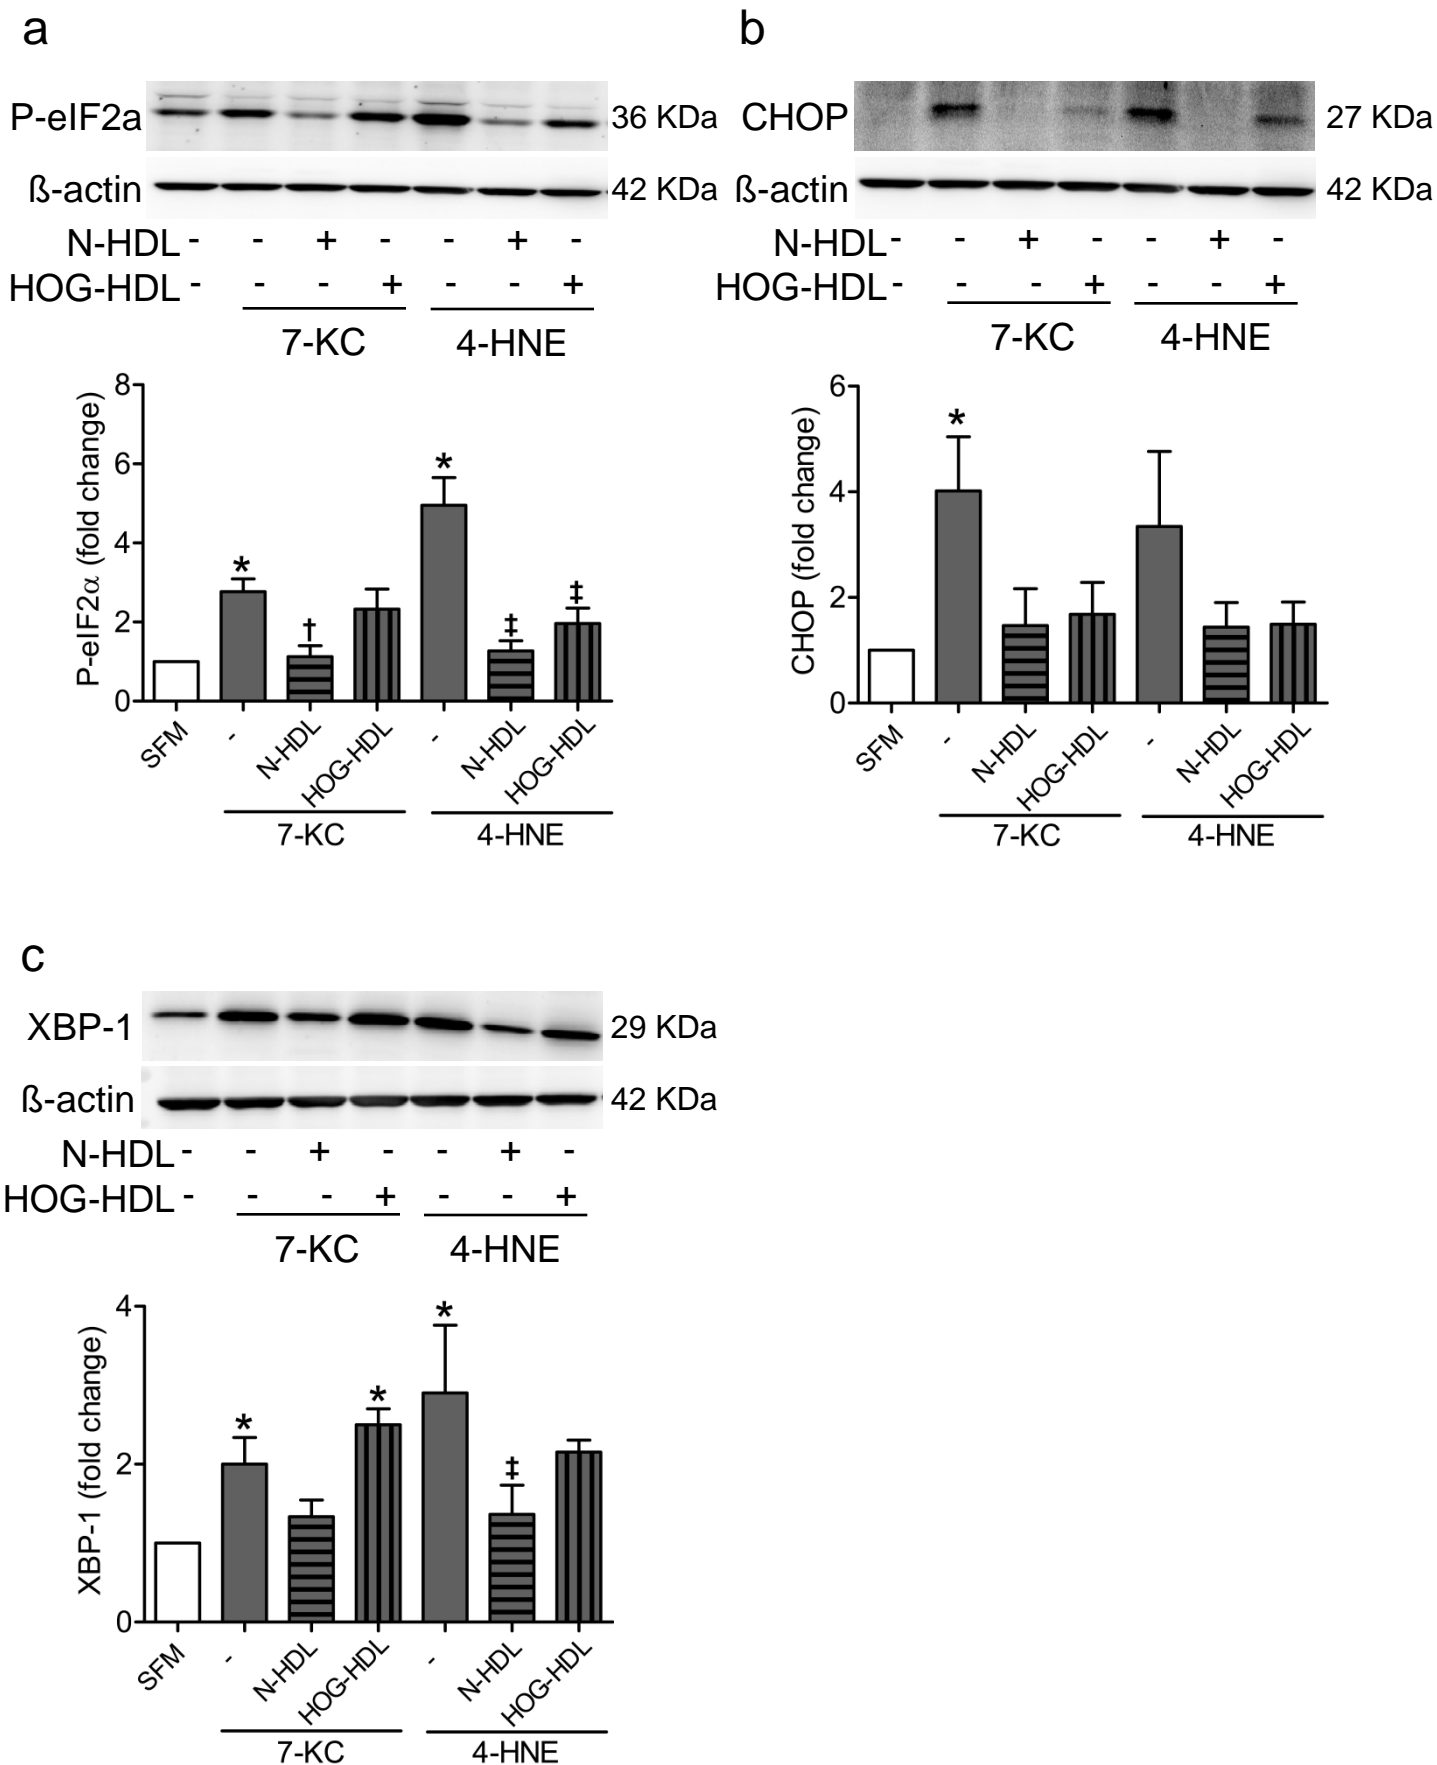

Supplement: NIHMS504720-supplement-125_2013_2986_MOESM2_ESM.pdf [file NIHMS504720-supplement-125_2013_2986_MOESM2_ESM.pdf]

ESM Fig. 3

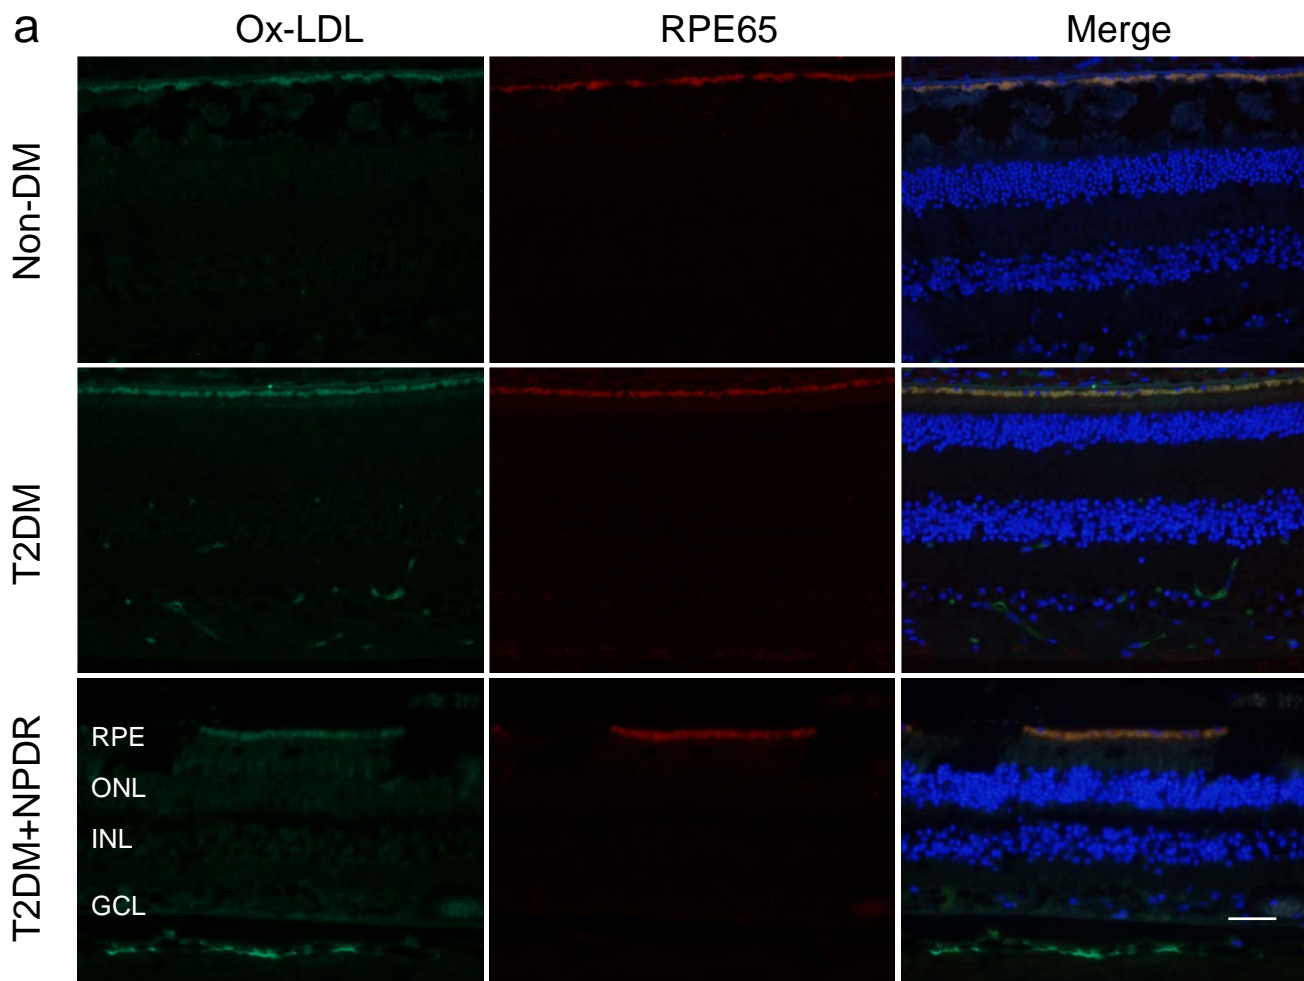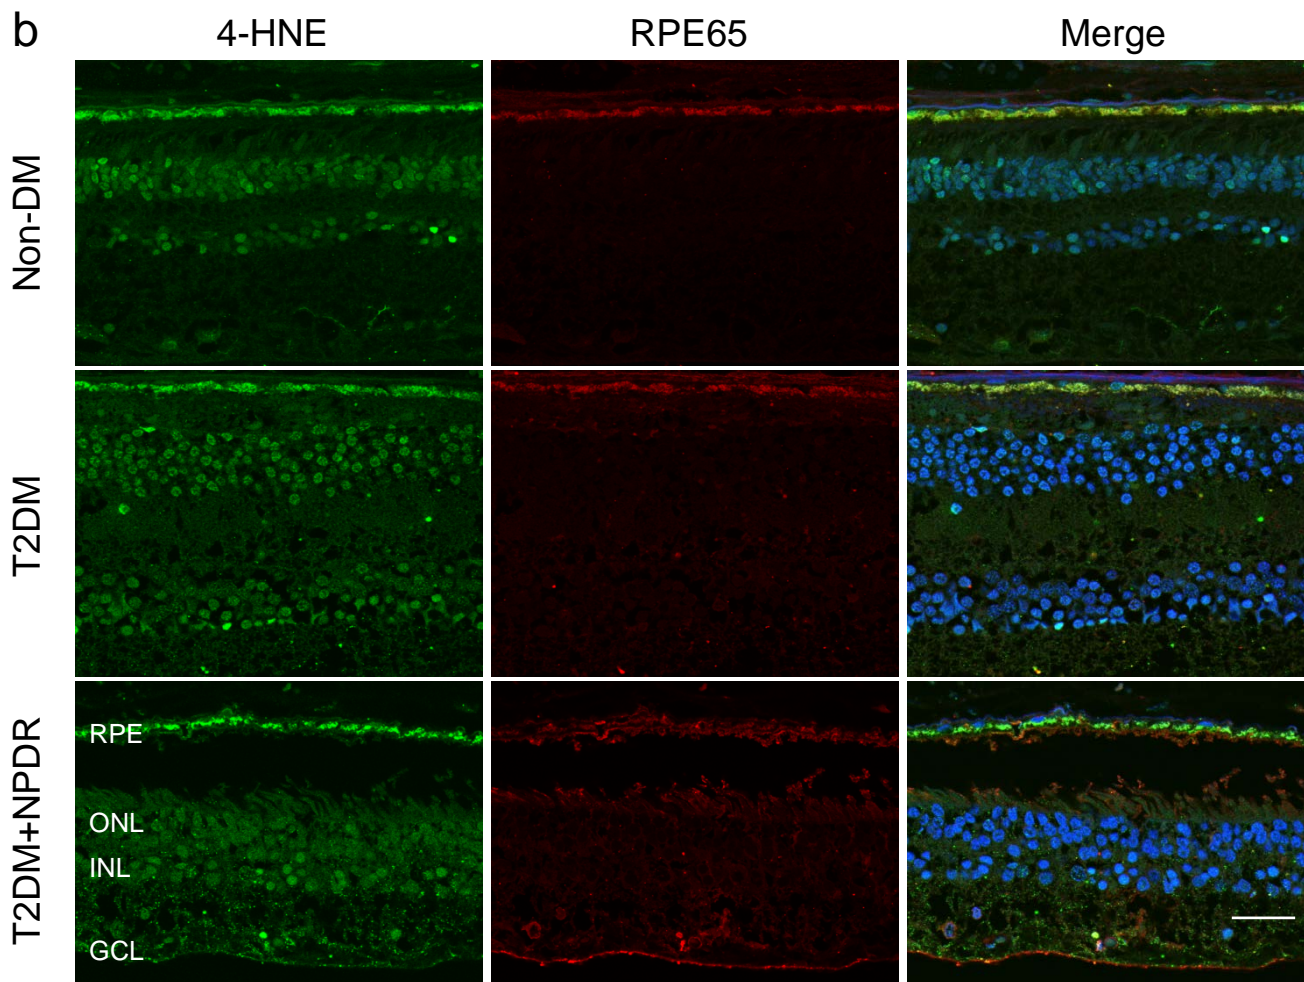

Supplement: NIHMS504720-supplement-125_2013_2986_MOESM3_ESM.pdf [file NIHMS504720-supplement-125_2013_2986_MOESM3_ESM.pdf]
